# Supplementary material
Source: bioRxiv or medRxiv preprint supplement (https://www.biorxiv.org/highwire/filestream/78490/field_highwire_adjunct_files/3/053728-4.pdf)
Supplement: Supplementary file [file 053728-4.pdf]

**SUPPLEMENTARY MATERIALS:**

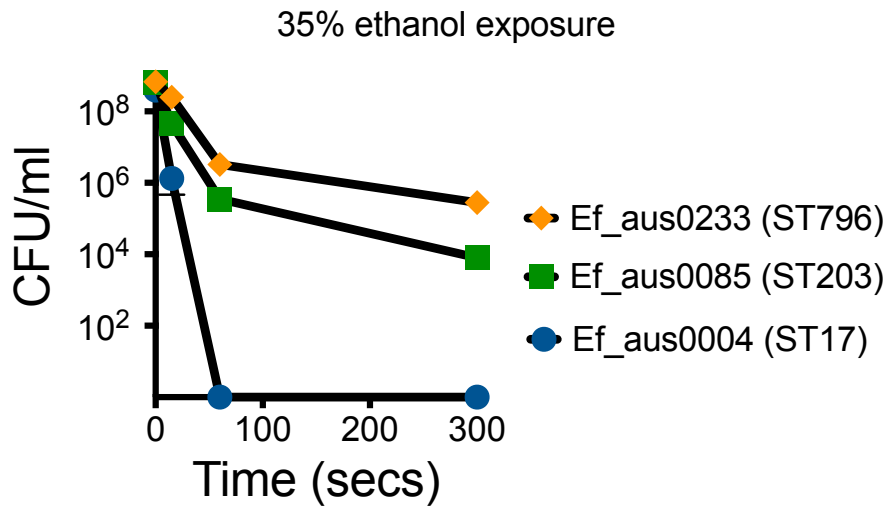

**Fig. S1.** Tolerance of *E. faecium* to ethanol exposure. Time-kill assay showing tolerance of three *E. faecium* isolates to 35% v/v ethanol.

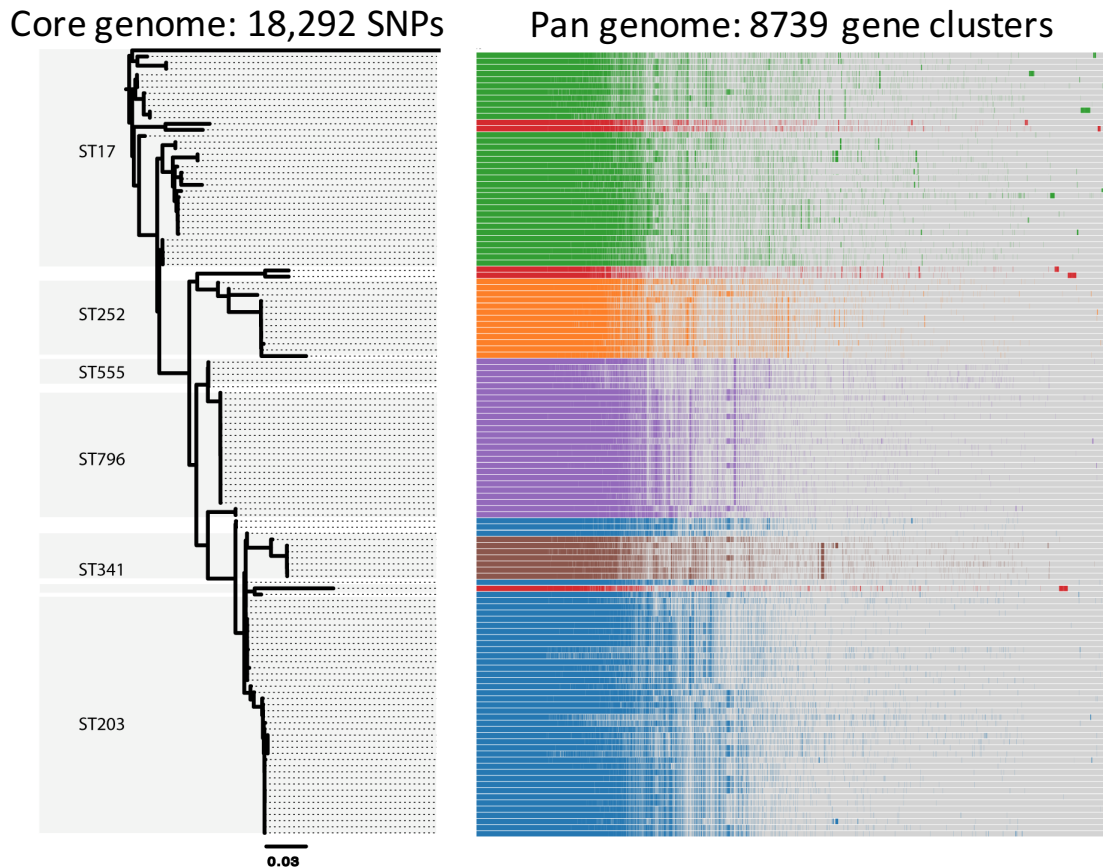

**Fig. S2.** Core and pan genome analysis of 129 *E. faecium* genomes. Core genome maximum likelihood phylogeny inferred from pairwise SNP alignments of 18,292 variable nucleotide positions against reference genome Ef\_aus0233, filtered to remove recombination. BAPS groups derived from the same core genome alignment are grey shaded blocks, with MLST indicated. Pan-genome analysis based on protein ortholog comparisons (Roary) and displayed using FriPan, showing shared and clone-specific gene content among the Efm population. Note the Ef\_aus0233 reference genome has 2,726 predicted CDS.

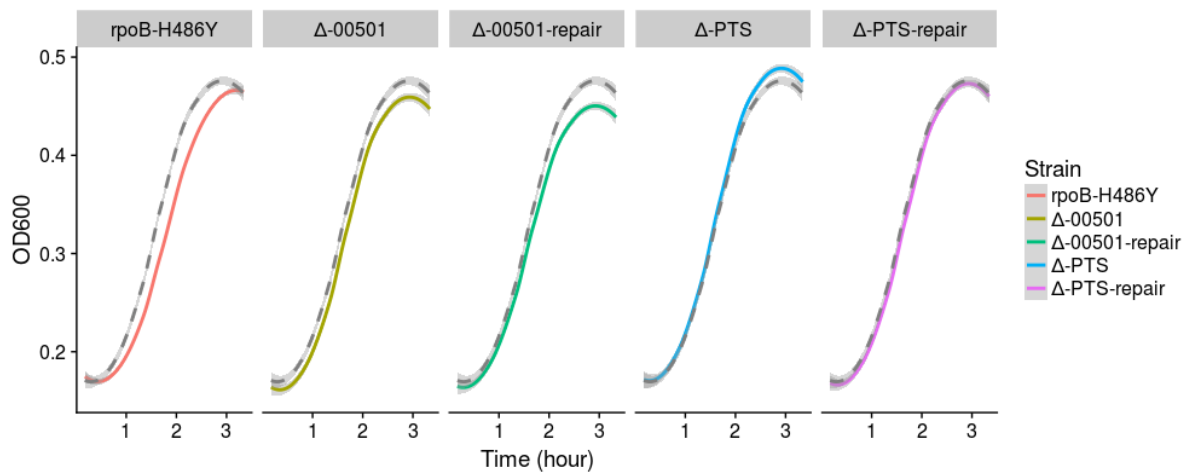

**Fig. S3.** Growth curves of mutants. Plots depict growth curves of wild type *E. faecium* Ef\_ aus0233 against the *rpoB* mutant and the two targeted mutants and their repaired versions, showing mutagenesis had no impact on the growth rate of the strains.

1 **Table S1:** Oligonucleotides used in this study

| <b>Primer name</b> | <b>Sequence (5' – 3')</b>                                      |
|--------------------|----------------------------------------------------------------|
| IM585 501 OUT F    | TTGTTTTTCCAAGTGTTCATCAAGG                                      |
| IM586 501 OUT R    | TCTGTCACTGTTTCAAATACTGATCC                                     |
| IM587 501 AF       | <b>CCTCACTAAAGGGAACAAAAGCTGGGTACCCATACGTTTACGATAGTTCGTAGC</b>  |
| IM588 501 BR       | CATAATCTGTATTCTCTCCTGTTC                                       |
| IM589 501 CF       | <i>TGAACAGGAGAGGAATACAGATTATGTAAGAAAGGATCTTGAAAATGAAGATTAC</i> |
| IM590 501 DR       | <b>CGACTCACTATAGGGCGAATTGGAGCTCTGAATCGAACCAAATGCTGAGAAGC</b>   |
| IM862 PTS AF       | <b>CCTCACTAAAGGGAACAAAAGCTGGGTACCATCTCCAGTGATCATCATAGGAAGC</b> |
| IM863 PTS BR       | CATCCTCAACACAAAAAACAGGCAG                                      |
| IM864 PTS CF       | <i>CTGCCTGTTTTTGTGTTGAGGATGTGAGCGCTCAGTAATACTATTGATGC</i>      |
| IM865 PTS DR       | <b>CGACTCACTATAGGGCGAATTGGAGCTCTTCGGACACCGTTACCTAAGGTAC</b>    |

2 **Notes:** Bold typeface indicates tails for SLiCE cloning into pIMAY-Z; italic typeface indicates complementary to B primer for SOE-PCR.

3
